# Supplementary material
Source: Research Square preprint supplement (doi:10.21203/rs.3.rs-10317363/v1)
Supplement: Supplementary file 1 [file 89dce8c4511777ec2d2f099d.docx]

**English Version of the Semi-Structured Interview Guide**

**Research Title:** Caring in the Shadows: The Lived Experiences of Family Caregivers of Older Adults with Dementia in Fragile and Conflict-Affected Settings in Ethiopia.

**Interviewer Instructions:**

- **Bold text** indicates the core question to be asked directly.
- *Bulleted text* indicates optional probes. Only use these if the participant's initial answer is brief or misses key details.
- [Bracketed text] indicates instructions for the interviewer.

**Pre-Interview Setup**

- [Ensure informed consent has been signed or verbally agreed to.]
- [Start the audio recorder.]
- [State the Date, Time, Location, and Participant ID for the recording.]

**1. Can you tell me how you became the primary caregiver for your family member living with dementia?**

- *How did the caregiving role begin?*
- *Was this your own decision or expected by your family?*
- *How did you feel when you first became the caregiver?*
- *Were you prepared for this responsibility?*

**2. Please describe what a typical day looks like as you care for your family member.**

- *How much time do you spend providing care?*
- *How has your daily routine changed?*

**3. In what ways has caregiving changed your personal, family, work, or social life?**

- *Employment or Education*
- *Family responsibilities*
- *Social relationships*
- *Personal goals or Leisure activities*

**4. How has caregiving affected your future plans, aspirations, or life goals?**

- *Career or Education*
- *Marriage or family life*
- *Personal development or Future expectations*

**5. How has providing care affected your own physical health?**

- *Fatigue or Sleep*
- *Pain or Illness*
- *Ability to rest*

**6. Can you describe the emotional or psychological impact of caregiving on your life?**

- *Stress or Anxiety*
- *Sadness or Worry*
- *Feelings of hopelessness or Emotional exhaustion*

**7. How has caregiving affected your family's financial situation?**

- *Loss of income or Employment*
- *Medical expenses or Transportation costs*
- *Daily household expenses*

**8. How has caregiving affected your relationships with family members, friends, and your community?**

- *Participation in social activities*
- *Religious or community gatherings*
- *Feelings of isolation or Availability of social support*

**9. How has the conflict or post-war situation affected your experience of caring for your family member?** [Note: Monitor the participant for distress during this question. Allow them time to pause if needed.]

- *Access to healthcare and Medicines*
- *Transportation, Food, and essential supplies*
- *Safety and security*
- *Displacement or Loss of family members*
- *Access to support services*

**10. What does being a caregiver mean to you?**

- *Sense of responsibility or Personal values*
- *Cultural expectations or religious beliefs*
- *How caregiving has changed who you are*
- *Sources of strength and motivation*

**11. Is there anything else about your caregiving experience that you would like to share that we have not discussed?**

**[Post-Interview Debrief]**

- [Stop the audio recorder.]
- **"Thank you very much for sharing your experiences. Your participation is greatly appreciated."**
- [Provide any promised compensation or referral information for support services.]
